# Supplementary material for: HOX paralogs selectively convert binding of ubiquitous transcription factors into tissue-specific patterns of enhancer activation
Source: PubMed Central journal article supplement (PMC7769617; doi:10.1371/journal.pgen.1009162), 2020-12-14

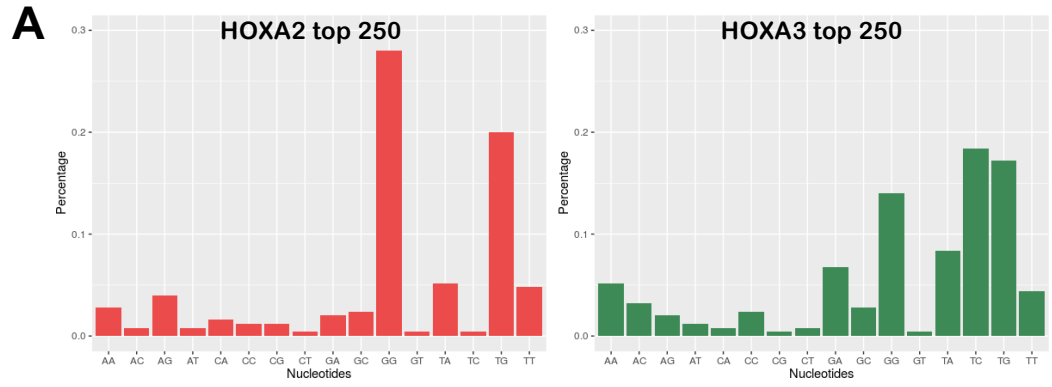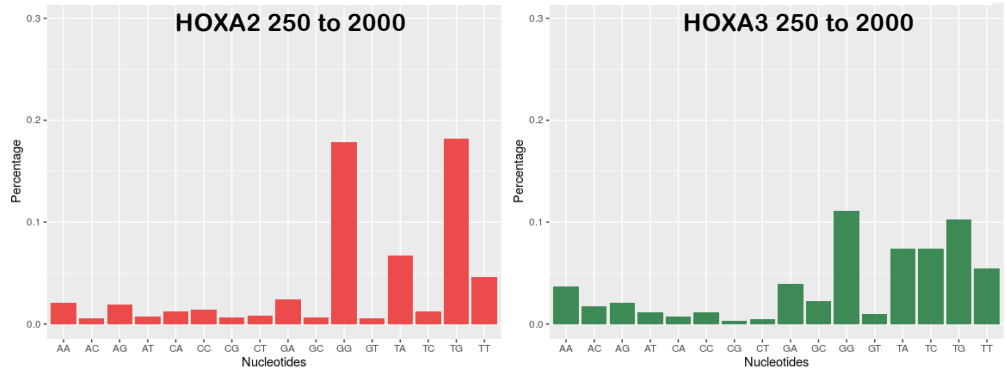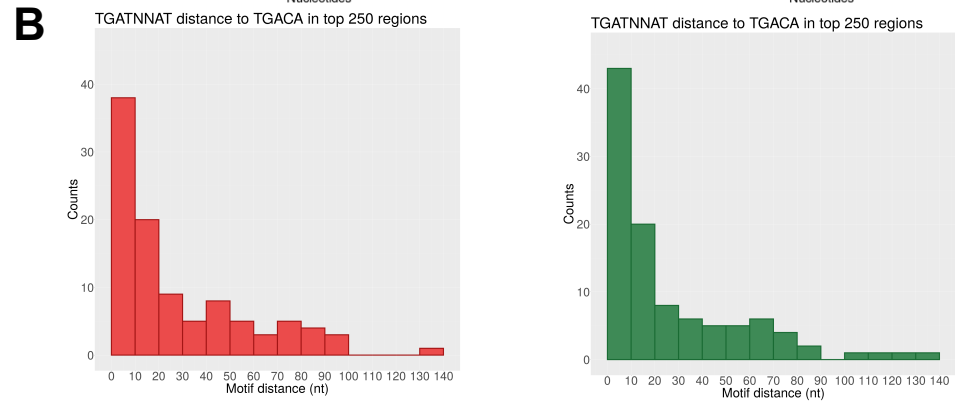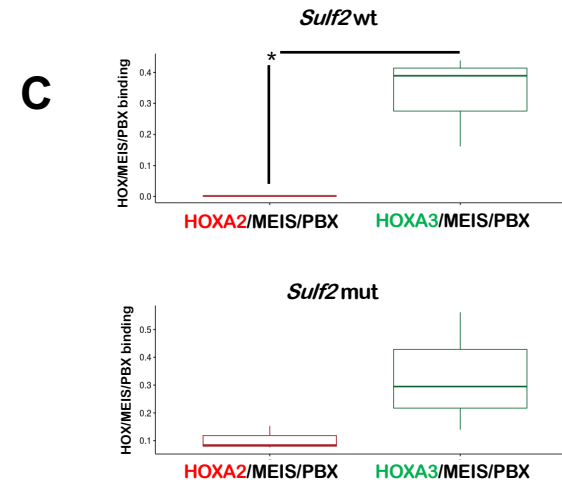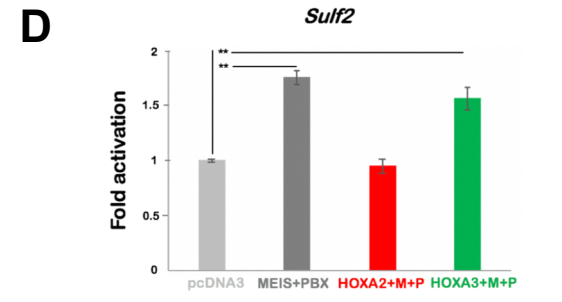

Supplement: pgen.1009162.s002.pdf [file pgen.1009162.s002.pdf]
