# Supplementary material for: HOX paralogs selectively convert binding of ubiquitous transcription factors into tissue-specific patterns of enhancer activation
Source: PubMed Central journal article supplement (PMC7769617; doi:10.1371/journal.pgen.1009162), 2020-12-14
Supplement: pgen.1009162.s004.pdf [file pgen.1009162.s004.pdf]

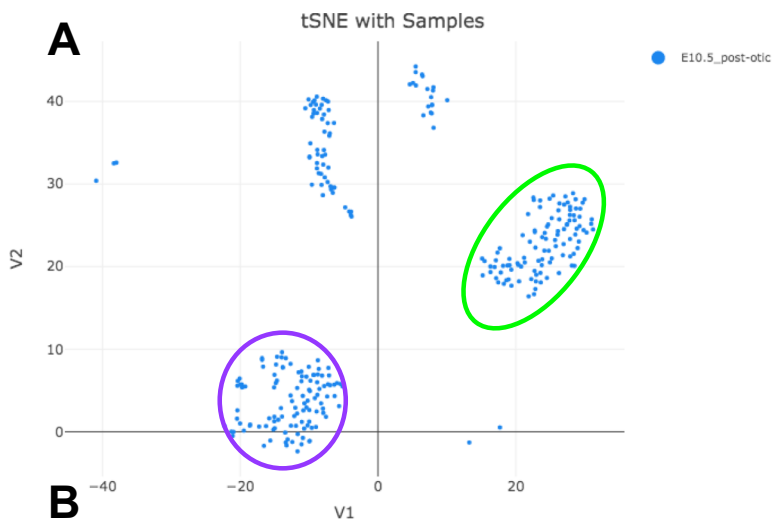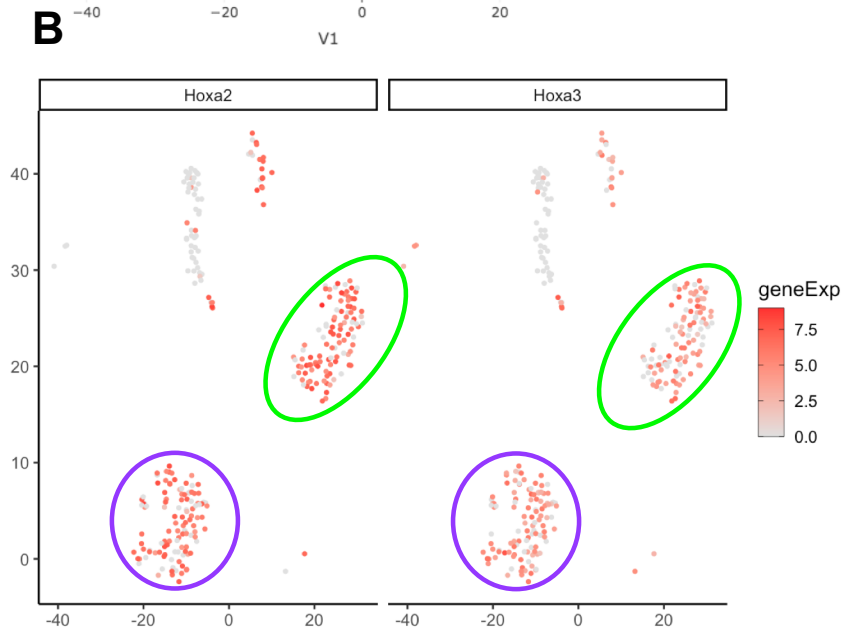

**C**

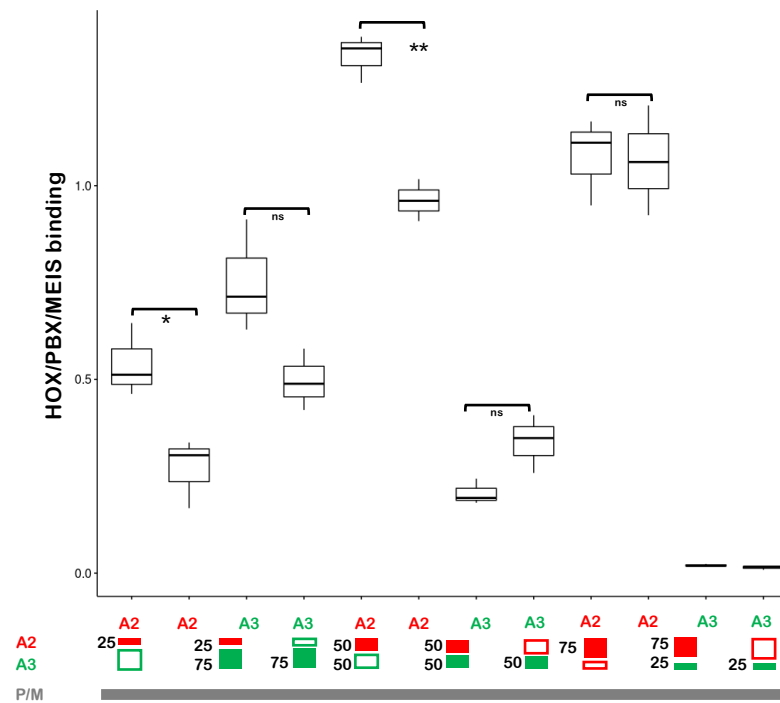

|         | Hoxa2 + | Hoxa2 - |
|---------|---------|---------|
| Hoxa3 + | 61*     | 10      |
| Hoxa3 - | 23      | 12      |

P=0.017

|         | Hoxa2 + | Hoxa2 - |
|---------|---------|---------|
| Hoxa3 + | 56*     | 12      |
| Hoxa3 - | 12      | 9       |

P=0.021
