# Supplementary material for: HOX paralogs selectively convert binding of ubiquitous transcription factors into tissue-specific patterns of enhancer activation
Source: PubMed Central journal article supplement (PMC7769617; doi:10.1371/journal.pgen.1009162), 2020-12-14

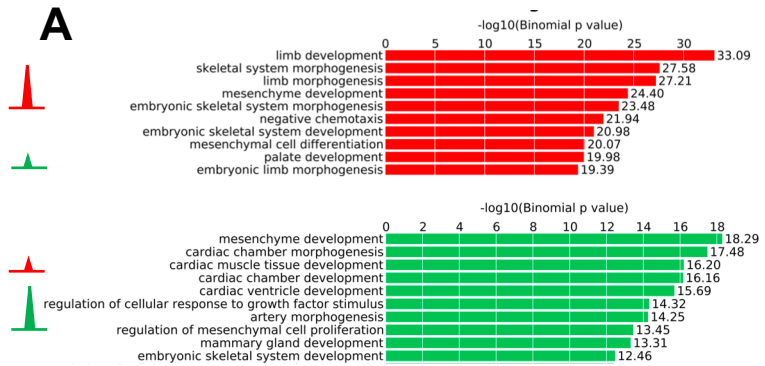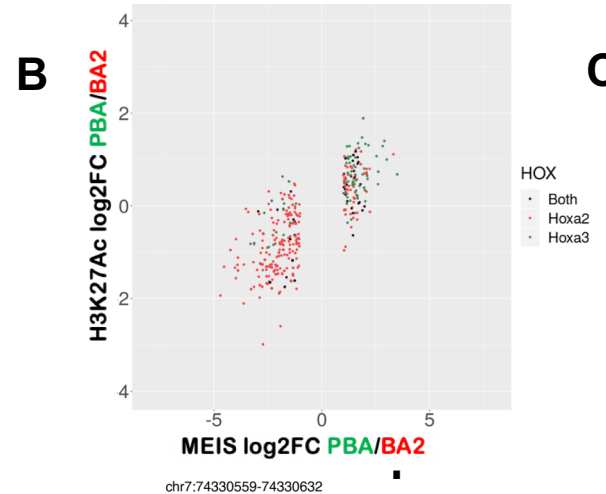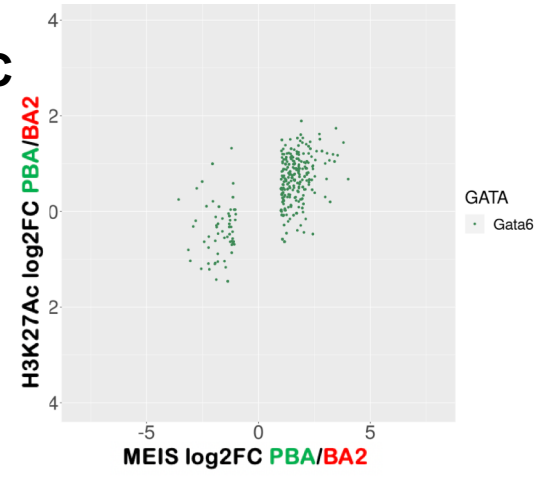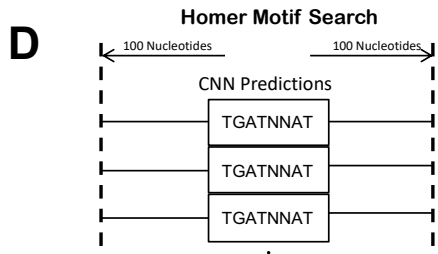

**E**

| TF family | de novo motif |
|-----------|---------------|
| Hox       | ATGATTAATGAC  |
| Hox-Nkx   | CTAATG        |
| Meis      | CGCTGCAG      |
| Forkhead  | AAAATAAACG    |

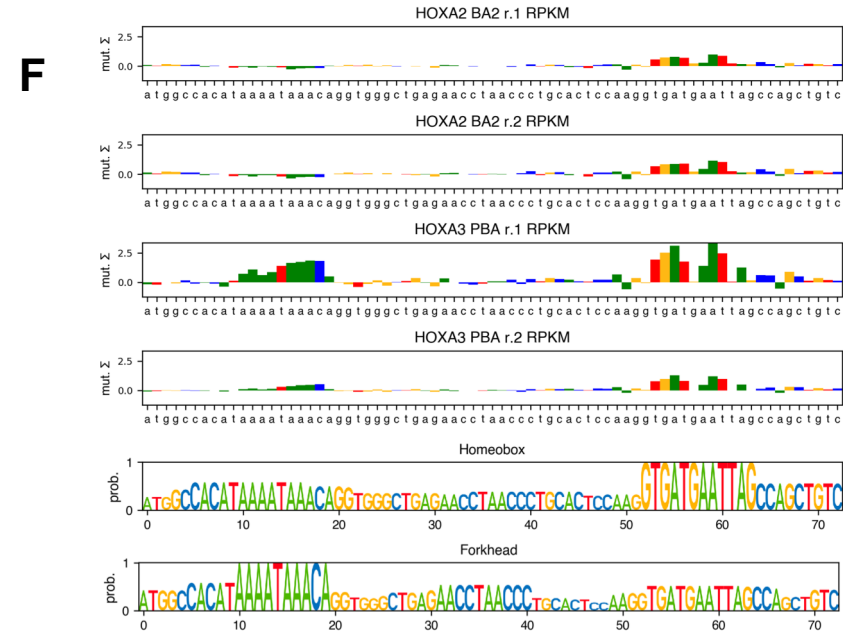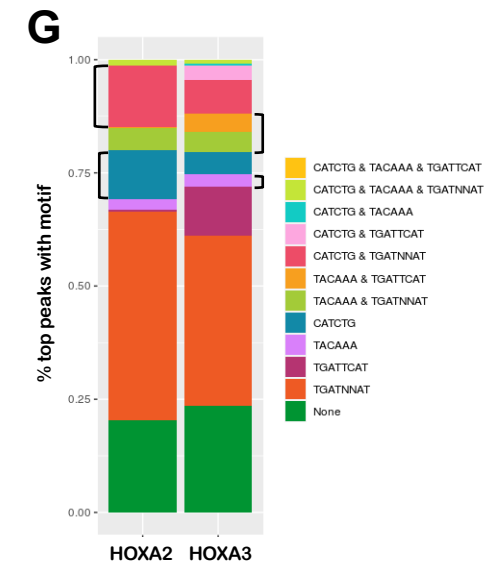

Supplement: pgen.1009162.s006.pdf [file pgen.1009162.s006.pdf]
